# Supplementary material
Source: publisher figshare collection journal article supplement (https://gsajournals.figshare.com/articles/dataset/_/10565984)

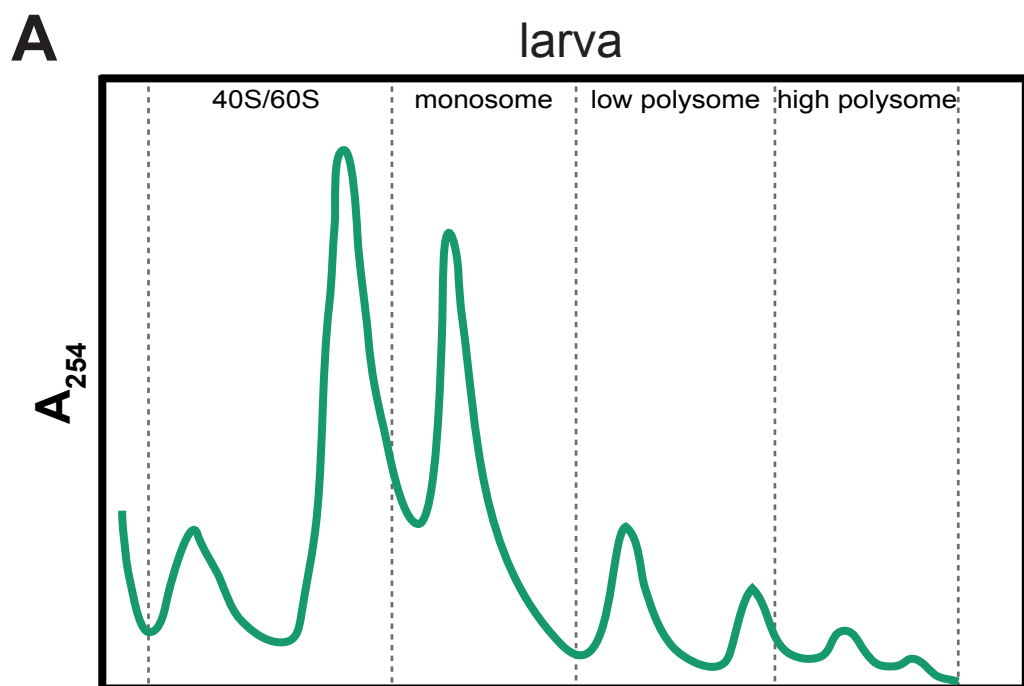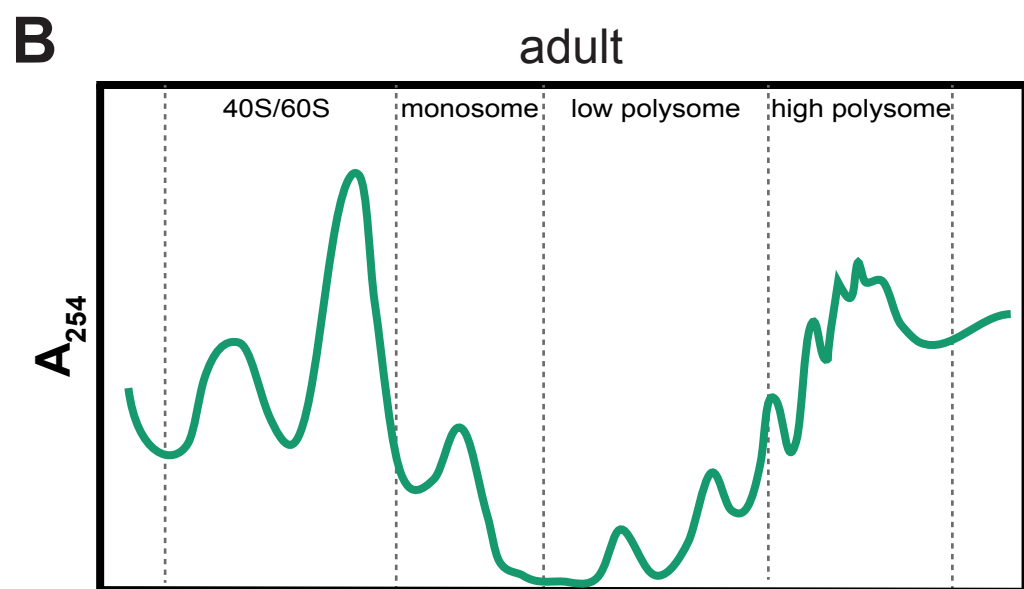

**FIGURE S1, Jorgensen et al.**

Supplement: Supplementary file 1 [file 1]

**A**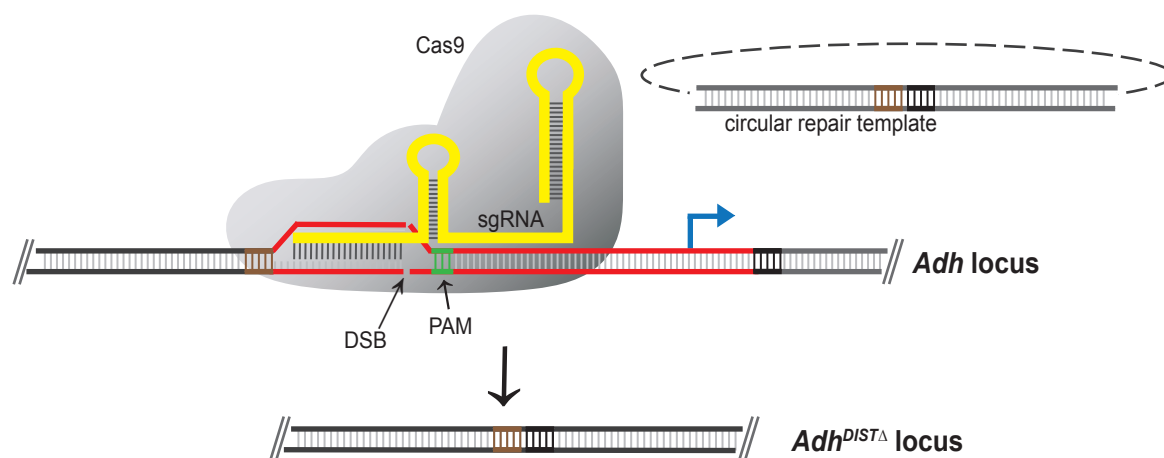**B**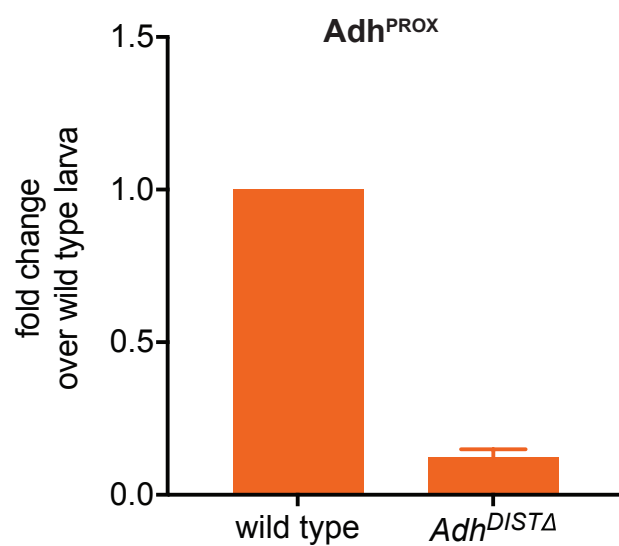

**FIGURE S2, Jorgensen et al.**

Supplement: Supplementary file 2 [file 1]

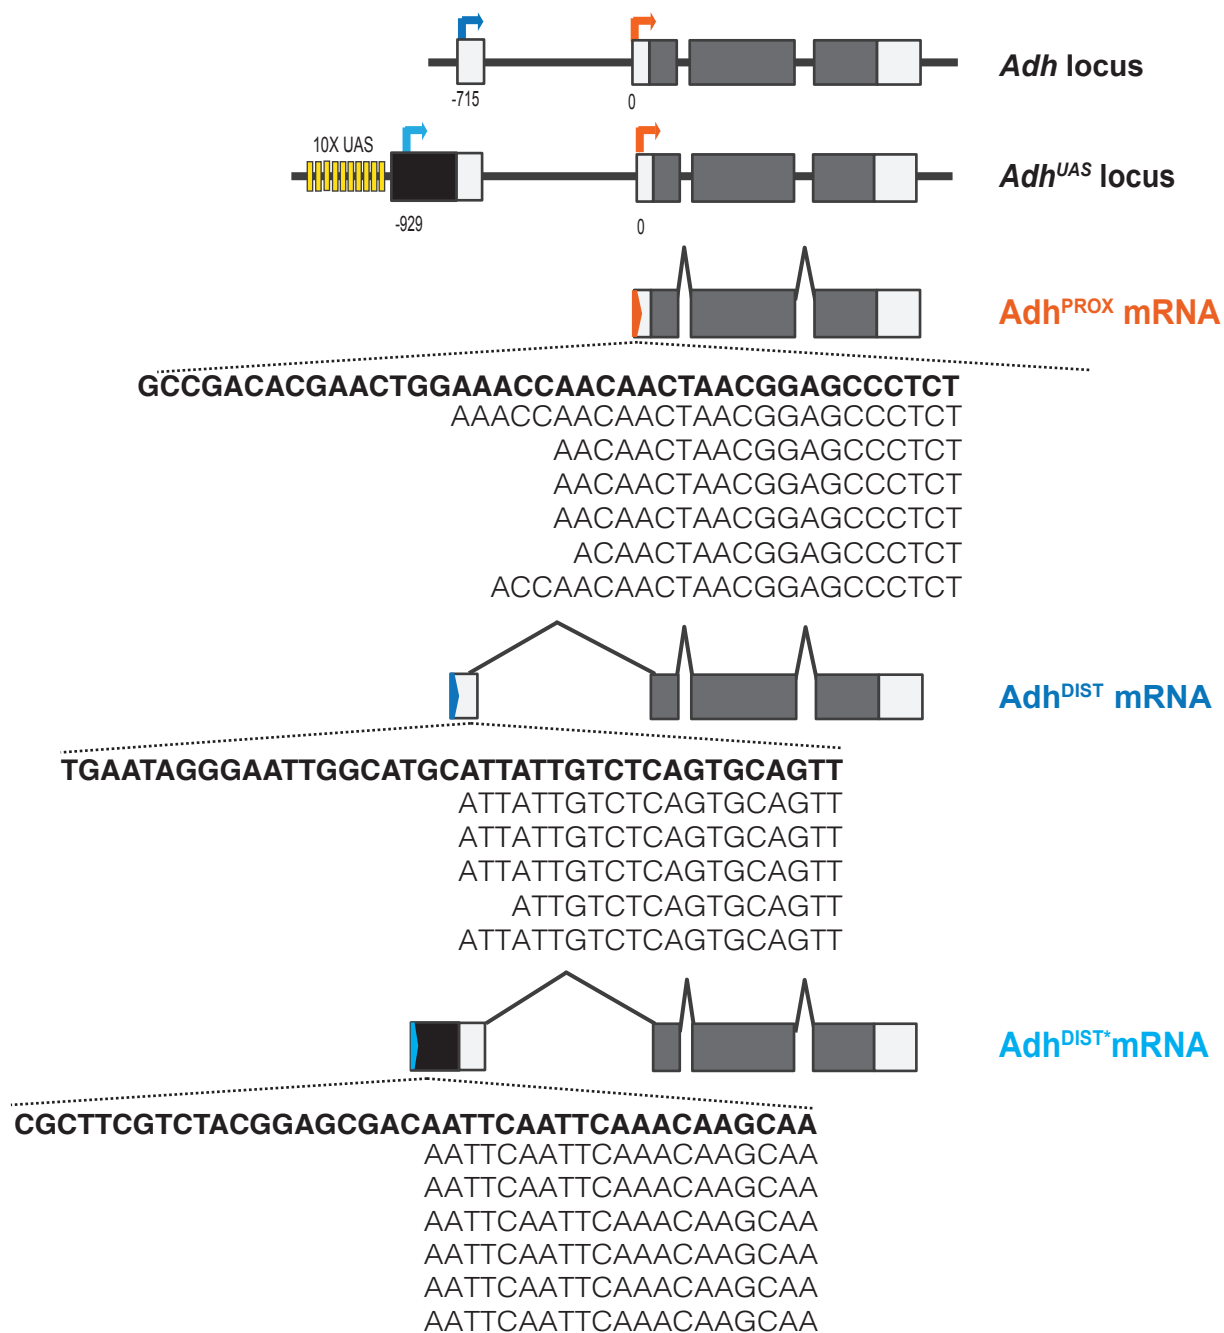

**FIGURE S3, Jorgensen et al.**

Supplement: Supplementary file 3 [file 1]
